# Supplementary material
Source: publisher site journal article supplement (https://www.dovepress.com/article/313891)
Supplement: Supplementary file 1 [file get_supplementary_file.php]

Supplement Table 1 Sleep characteristics in participants with or without ischemic stroke

| All subjects | Total  (n=4204) | Ischemic stroke (n=129) | Controls (n=4075) | P value |
| --- | --- | --- | --- | --- |
| WASO, min | 60.3±42.4 | 76.2±47.4 | 59.8±42.1 | <0.001 |
| SE, % | 83.4±10.0 | 79.2±10.8 | 83.5±10.0 | <0.001 |
| REM, % | 19.7±6.8 | 18.5±7.7 | 19.7±6.7 | 0.080 |
| SWS, % | 17.5±11.9 | 16.8±12.6 | 17.5±11.9 | 0.480 |
| SL, min | 12.8±19.5 | 13.6±20.2 | 12.8±19.5 | 0.631 |
| Total ArI, events/h | 19.0±10.4 | 19.1±8.7 | 19.0±10.4 | 0.961 |
| ArI-REM, events/h | 15.2±10.8 | 13.7±10.8 | 15.2±10.8 | 0.130 |
| ArI-NREM, events/h | 19.9±11.3 | 20.3±9.3 | 19.9±11.4 | 0.696 |
| SFI, events/h | 8.9±3.4 | 9.2±4.1 | 8.9±3.4 | 0.234 |
| AHI, events/h | 9.9±13.0 | 12.7±17.1 | 9.8±12.9 | 0.012 |
| Sleep duration, n (%) |  |  |  | 0.036 |
| <6h | 385 (9.2) | 19 (14.7) | 366 (9.0) | ― |
| 6h-8h | 2750 (65.4) | 73 (56.6) | 2677 (65.7) | ― |
| >8h | 1069 (25.4) | 37 (28.7) | 1032 (25.3) | ― |

AHI, apnea hypopnea index; ArI, arousal index; NREM, non-rapid eye movement; REM, rapid eye movement; SFI, sleep fragmentation index; SL, sleep latency; SWS, slow wave sleep; WASO, wake after sleep onset.

Supplement Table 2 Descriptive characteristics by sleep efficiency (quartile I: <80.0%; quartile II: 80.0%-84.9%; quartile III: 85.0%-89.9%; quartile IV: ≥90.0% )

|  |  | Sleep efficiency | | | |  |
| --- | --- | --- | --- | --- | --- | --- |
| Characteristics | Total (n=4204) | First quartile  (n=1247) | Second quartile  (n=737) | Third quartile  (n=1024) | Fourth quartile  (n=1196) | P value |
| Age, year | 63.8±11.1 | 68.1±10.5 | 65.1±10.9 | 62.7±10.4 | 59.3±10.5 | <0.001 |
| Gender, n (%) |  |  |  |  |  | <0.001 |
| Male | 1978 (47.1) | 664 (53.2) | 376 (51.0) | 477 (46.6) | 461 (38.5) | ― |
| Female | 2226 (52.9) | 583 (46.8) | 361 (49.0) | 547 (53.4) | 735 (61.5) | ― |
| Body mass index, kg/m2 | 28.2±5.0 | 28.4±5.0 | 28.4±4.9 | 28.4±5.2 | 27.8±4.8 | 0.020 |
| Race, n (%) |  |  |  |  |  | 0.772 |
| White | 3668 (87.3) | 1083 (86.8) | 637 (86.4) | 899 (87.8) | 1049 (87.7) | ― |
| Other | 536 (12.7) | 164 (13.2) | 100 (13.6) | 125 (12.2) | 147 (12.3) | ― |
| Smoking status, n (%) |  |  |  |  |  | 0.003 |
| Smoker | 2260 (53.8) | 721 (58.0) | 393 (53.4) | 542 (52.9) | 604 (50.5) | ― |
| Never smoker | 1938 (46.2) | 522 (42.0) | 343 (46.6) | 482 (47.1) | 591 (49.5) | ― |
| Alcohol use, n (%) |  |  |  |  |  | 0.227 |
| At least 1 drink per day | 1708 (43.3) | 489 (41.2) | 302 (44.4) | 409 (42.7) | 508 (45.3) | ― |
| None | 2238 (56.7) | 697 (58.8) | 378 (55.6) | 549 (57.3) | 614 (54.7) | ― |
| Benzodiazepine use, n (%) | 246 (5.9) | 94 (7.5) | 38 (5.2) | 63 (6.2) | 51 (4.3) | 0.005 |
| Diabetes mellitus, n (%) | 295 (7.0) | 122 (9.8) | 50 (6.8) | 76 (7.4) | 47 (3.9) | <0.001 |
| Hypertension, n (%) | 1681 (40.0) | 649 (52.0) | 310 (42.1) | 381 (37.2) | 341 (28.5) | <0.001 |
| AHI, events/h | 9.9±13.0 | 11.9±14.4 | 10.3±13.1 | 9.5±12.6 | 7.7±11.5 | <0.001 |
| Sleep duration, h | 7.3±0.9 | 7.4±1.0 | 7.4±0.9 | 7.3±0.9 | 7.2±0.9 | <0.001 |
| WASO, min | 60.3±42.4 | 105.9±45.9 | 62.8±19.1 | 43.85±13.7 | 25.4±10.6 | <0.001 |
| REM, % | 19.7±6.8 | 17.7±7.3 | 19.6±6.3 | 20.4±6.4 | 21.2±6.3 | <0.001 |
| SWS, % | 17.5±11.9 | 16.2±12.3 | 16.5±12.1 | 17.4±11.6 | 19.6±11.4 | <0.001 |
| SL, min | 12.8±19.5 | 22.0±28.4 | 13.8±15.6 | 10.6±12.1 | 4.6±7.8 | <0.001 |
| Total ArI, events/h | 19.0±10.4 | 22.3±12.0 | 19.8±9.8 | 18.4±9.4 | 15.8±8.6 | <0.001 |
| ArI-REM, events/h | 15.2±10.8 | 16.4±12.3 | 14.9±10.0 | 15.2±10.5 | 14.1±9.9 | <0.001 |
| ArI-NREM, events/h | 19.9±11.3 | 23.5±12.9 | 21.0±10.9 | 19.2±10.2 | 16.2±9.2 | <0.001 |
| SFI, events/h | 8.9±3.4 | 10.2±4.2 | 9.0±3.1 | 8.5±2.8 | 7.7±2.6 | <0.001 |
| Follow-up time, year | 10.7±3.0 | 9.8±3.5 | 10.6±3.1 | 11.0±2.8 | 11.1±2.8 | <0.001 |

AHI, apnea hypopnea index; ArI, arousal index; NREM, non-rapid eye movement; REM, rapid eye movement; SFI, sleep fragmentation index; SL, sleep latency; SWS, slow wave sleep; WASO, wake after sleep onset. Results are presented as mean ± standard deviation or n (%). The P values represent the difference among four groups.

Supplement Table 3 Descriptive characteristics by sleep duration categorizes

|  |  | Sleep duration | | |  |
| --- | --- | --- | --- | --- | --- |
| Characteristics | Total (n=4204) | <6h  (n=385) | >8h  (n=1069) | 6h-8h  (n=2750) | P value |
| Age, year | 63.8±11.1 | 65.6±10.2 | 64.3±11.2 | 63.3±11.1 | <0.001 |
| Gender, n (%) |  |  |  |  | <0.001 |
| Male | 1978 (47.1) | 203 (52.7) | 435 (40.7) | 1340 (48.7) | ― |
| Female | 2226 (52.9) | 182 (47.3) | 634 (59.3) | 1410 (51.3) | ― |
| Body mass index, kg/m2 | 28.2±5.0 | 28.9±5.2 | 28.1±5.0 | 28.2±5.0 | 0.022 |
| Race, n (%) |  |  |  |  | 0.232 |
| White | 3668 (87.3) | 342 (88.8) | 918 (85.9) | 2408 (87.6) | ― |
| Other | 536 (12.7) | 43 (11.2) | 151 (14.1) | 342 (12.4) | ― |
| Smoking status, n (%) |  |  |  |  | 0.069 |
| Smoker | 2260 (53.8) | 227 (59.0) | 555 (52.1) | 1478 (53.8) | ― |
| Never smoker | 1938 (46.2) | 158 (41.0) | 510 (47.9) | 1270 (46.2) | ― |
| Alcohol use, n (%) |  |  |  |  | 0.013 |
| At least 1 drink per day | 1708 (43.3) | 168 (46.0) | 395 (39.4) | 1145 (44.4) | ― |
| None | 2238 (56.7) | 197 (54.0) | 608 (60.6) | 1433 (55.6) | ― |
| Benzodiazepine use, n (%) | 246 (5.9) | 22 (5.7) | 53 (5.0) | 171 (6.2) | 0.324 |
| Diabetes mellitus, n (%) | 295 (7.0) | 41 (10.6) | 84 (7.9) | 170 (6.2) | 0.003 |
| Hypertension, n (%) | 1681 (40.0) | 170 (44.2) | 444 (41.5) | 1067 (38.8) | 0.065 |
| AHI, events/h | 9.9±13.0 | 10.2±11.8 | 10.1±14.1 | 9.7±12.8 | 0.606 |
| SE, % | 83.4±10.0 | 83.7±11.3 | 81.5±10.4 | 84.0±9.6 | <0.001 |
| WASO, min | 60.3±42.4 | 40.0±30.3 | 76.2±48.6 | 57.0±39.1 | <0.001 |
| REM, % | 19.7±6.8 | 18.2±8.0 | 20.0±6.3 | 19.7±6.7 | <0.001 |
| SWS, % | 17.5±11.9 | 19.5±14.7 | 16.7±11.2 | 17.5±11.7 | 0.001 |
| SL, min | 12.8±19.5 | 12.3±20.6 | 15.8±23.5 | 11.7±17.4 | <0.001 |
| Total ArI, events/h | 19.0±10.4 | 19.6±10.4 | 19.3±10.6 | 18.8±10.3 | 0.268 |
| ArI-REM, events/h | 15.2±10.8 | 15.2±12.5 | 15.3±11.0 | 15.1±10.5 | 0.276 |
| ArI-NREM, events/h | 19.9±11.3 | 20.5±11.2 | 20.2±11.6 | 19.7±11.2 | 0.914 |
| SFI, events/h | 8.9±3.4 | 9.1±3.7 | 8.9±3.5 | 8.8±3.3 | 0.386 |
| Follow-up time, year | 10.7±3.0 | 10.2±3.5 | 10.5±3.2 | 10.7±3.0 | 0.004 |

AHI, apnea hypopnea index; ArI, arousal index; NREM, non-rapid eye movement; REM, rapid eye movement; SFI, sleep fragmentation index; SL, sleep latency; SWS, slow wave sleep; WASO, wake after sleep onset. Results are presented as mean ± standard deviation or n (%). The P values represent the difference among three groups.

Supplement Table 4 HRs and 95% CIs for AHI associated with ischemic stroke

|  |  | Univariable Models |  | Multivariable adjusted† |  | Multivariable adjusted‡ |  |
| --- | --- | --- | --- | --- | --- | --- | --- |
|  | Event, n (%) | HR (95%CI) | P | HR (95%CI) | P | HR (95%CI) | P |
| AHI, events/h | 129 (3.1 %) |  |  |  |  |  |  |
| ≥30.0 | 11 (3.8 %) | 1.808 (0.936-3.491) | 0.078 | 1.600 (0.805-3.182) | 0.180 | 1.608 (0.810-3.194) | 0.175 |
| 15.0-29.9 | 22 (3.8 %) | 1.775 (1.068-2.951) | 0.027 | 1.670 (0.981-2.844) | 0.059 | 1.663 (0.977-2.831) | 0.061 |
| 5.0-14.9 | 50 (3.9 %) | 1.794 (1.202-2.677) | 0.004 | 1.562 (1.027-2.378) | 0.037 | 1.556 (1.022-2.368) | 0.039 |
| <5.0 | 46 (2.2 %) | 1(Ref) |  | 1(Ref) |  | 1(Ref) |  |

AHI, apnea hypopnea index; 95% CI, 95% confidence interval; HR, hazard ratio.

† adjusted by age, gender, smoking status, race, body mass index, prevalent hypertension and diabetes mellitus, benzodiazepine use, alcohol use

‡ adjusted by † plus sleep duration

Supplement Table 5 Multivariate Cox regression analysis for sleep characteristics associated with ischemic stroke stratified by AHI (<15 events/hour vs. ≥15 events/hour)

|  | **AHI (< 15 events/hour)** |  | **AHI (**＞**15 events/hour)** |  |  |
| --- | --- | --- | --- | --- | --- |
| **Sleep characteristics** | HR (95% CI) | P | HR (95% CI) | P | Pinteraction |
| WASO | 1.003 (0.999 to 1.008) | 0.107 | 1.008 (1.001 to 1.015) | 0.023 | 0.313 |
| SE | 0.983 (0.966 to 1.001) | 0.058 | 0.966 (0.938 to 0.994) | 0.018 | 0.343 |
| REM, % | 0.995 (0.968 to 1.024) | 0.753 | 0.982 (0.933 to 1.034) | 0.482 | 0.847 |
| SWS, % | 0.993 (0.975 to 1.011) | 0.438 | 0.980 (0.950 to 1.010) | 0.196 | 0.509 |
| SL | 1.001 (0.990 to 1.011) | 0.917 | 1.008 (0.992 to 1.024) | 0.318 | 0.923 |
| SFI | 1.014 (0.961 to 1.070) | 0.622 | 1.022 (0.918 to 1.138) | 0.686 | 0.659 |
| Total ArI | 0.995 (0.974 to 1.017) | 0.675 | 1.003 (0.969 to 1.038) | 0.866 | 0.623 |
| ArI-REM | 0.987 (0.966 to 1.008) | 0.223 | 1.005 (0.972 to 1.039) | 0.772 | 0.303 |
| ArI-NREM | 0.998 (0.978 to 1.017) | 0.822 | 1.002 (0.972 to 1.034) | 0.874 | 0.721 |
| Sleep duration |  |  |  |  | 0.279 |
| <6h | 1.454 (0.776 to 2.724) | 0.243 | 2.893 (1.108 to 7.553) | 0.030 | ― |
| >8h | 1.113 (0.695 to 1.780) | 0.657 | 1.811 (0.801 to 4.095) | 0.153 | ― |
| 6h-8h | 1(Ref) |  | 1(Ref) |  | ― |

AHI, apnea hypopnea index; ArI, arousal index; NREM, non-rapid eye movement; REM, rapid eye movement; SFI, sleep fragmentation index; SL, sleep latency; SWS, slow wave sleep; WASO, wake after sleep onset.

Multivariate adjusted by age, gender, smoking status, race, body mass index, prevalent hypertension and diabetes mellitus, benzodiazepine use, alcohol use and sleep duration

Supplement Table 6 Multivariate Cox regression analysis for sleep characteristics associated with ischemic stroke stratified by men and women

|  | **Men** |  | **Women** |  |  |
| --- | --- | --- | --- | --- | --- |
| **Sleep characteristics** | HR (95%CI) | P | HR (95%CI) | P | Pinteraction |
| WASO | 1.000 (0.994 to 1.006) | 0.988 | 1.007 (1.002 to 1.011) | 0.005 | 0.165 |
| SE | 1.000 (0.973 to 1.029) | 0.976 | 0.970 (0.952 to 0.988) | 0.001 | 0.060 |
| REM, % | 1.021 (0.978 to 1.066) | 0.349 | 0.984 (0.954 to 1.015) | 0.306 | 0.145 |
| SWS, % | 0.972 (0.940 to 1.006) | 0.102 | 1.000 (0.981 to 1.018) | 0.964 | 0.135 |
| SL | 1.002 (0.987 to 1.018) | 0.775 | 1.002 (0.991 to 1.012) | 0.758 | 0.923 |
| SFI | 1.001 (0.933 to 1.074) | 0.980 | 1.024 (0.956 to 1.096) | 0.501 | 0.658 |
| Total ArI | 0.986 (0.956 to 1.017) | 0.377 | 0.995 (0.967 to 1.024) | 0.730 | 0.944 |
| ArI-REM | 0.969 (0.937 to 1.002) | 0.067 | 0.996 (0.974 to 1.019) | 0.747 | 0.233 |
| ArI-NREM | 0.992 (0.965 to 1.019) | 0.540 | 0.996 (0.971 to 1.022) | 0.775 | 0.935 |
| Sleep duration |  |  |  |  | 0.450 |
| <6h | 1.074 (0.413 to 2.793) | 0.883 | 2.270 (1.208 to 4.264) | 0.011 | ― |
| >8h | 1.069 (0.533 to 2.142) | 0.852 | 1.313 (0.792 to 2.176) | 0.290 | ― |
| 6h-8h | 1(Ref) |  | 1(Ref) |  | ― |

AHI, apnea hypopnea index; ArI, arousal index; NREM, non-rapid eye movement; REM, rapid eye movement; SFI, sleep fragmentation index; SL, sleep latency; SWS, slow wave sleep; WASO, wake after sleep onset.

Multivariate adjusted by age, smoking status, race, body mass index, prevalent hypertension and diabetes mellitus, apnea-hypopnea index, benzodiazepine use, alcohol use and sleep duration.

**Supplement Methods**

**Technical Notes on SHHS1**

The Compumedics P-Series Sleep Monitoring System used for SHHS1 consisted of a Main Unit and Patient Interface Box (PIB). The signals were obtained by the use of electrodes/sensors that connected to the PIB via Harwin connectors. The PIB connected to the Main Unit using an analogue cable and signals were recorded in digitized format onto a solid-state memory device (PCMCIA Memory Card) in the Main Unit. The montage was set up so that only 2.01 Mb/hour of data was recorded, providing 10 hours of data for the 20 Mb flashcards which were used. The PIB had 6 switch banks with toggle switches which would control the amplifiers (on/off). The main unit was powered by a rechargeable Nickel Metal Hydride battery. The PIB and loose electrode wires and sensor cables were supported by a cloth “bib/vest” with the recording unit placed in the center pocket. This bib/vest was placed over the participants’ nightclothes. After collection the study would be downloaded to a computer via serial lead, battery recharged and flash card reformatted.

The recording montage consisted of : (1) C3/A2 and C4/A1 EEGs, sampled at 125 Hz; (2) right and left electrooculograms (EOGs), sampled at 50 Hz; (3) a bipolar submental electromyogram (EMG), sampled at 125 Hz; (4) thoracic and abdominal excursions (THOR and ABDO), recorded by inductive plethysmography bands and sampled at 10 Hz; (5) “airflow” detected by a nasal-oral thermocouple (Protec, Woodinville, WA), sampled at 10 Hz; (6) finger-tip pulse oximetry (Nonin, Minneapolis, MN) sampled at 1 Hz; (7) ECG from a bipolar lead, sampled at 125 Hz for most SHHS-1 studies and 250 Hz for SHHS-2 studies; (8) Heart rate (PR) derived from the ECG and sampled at 1 Hz; (9) body position (using a mercury gauge sensor) ambient light (on/off, by a light sensor secured to the recording garment). The details about montage and sampling rate information on SHHS1 is below:

| **Channel** | **EDF Label** | **Input 1** | **Input 2** | **Sampling rate (Hz)** | **Hardware filters (Hz)** | **Sensor type** |
| --- | --- | --- | --- | --- | --- | --- |
| SpO2 | SaO2 | SaO2 | - | 1 | - | Nonin XPOD 3011, 8000 sensor |
| Heart Rate | H.R. | H.R. | - | 1 | - | Nonin XPOD 3011, 8000 sensor |
| Linked EEG | EEG (sec) | C3 | A2 | 125 | High pass 0.15 | Gold cup electrode |
| Linked EEG | EEG | C4 | A1 | 125 | High pass 0.15 | Gold cup electrode |
| ECG | ECG | ECG | - | 125 | High pass 0.15 | Ag/AgCl patch |
| Left EOG | EOG(L) | EOG(L) | PG1 | 50 | High pass 0.15 | Gold cup electrode |
| Right EOG | EOG(R) | EOG(R) | PG1 | 50 | High pass 0.15 | Gold cup electrode |
| EMG | EMG | EMG | - | 125 | High pass 0.15 | Gold cup electrode |
| Thorax | Thor RES | Thor RES | - | 10 | High pass 0.05 | Respitrace Inductance Plethysmography |
| Abdomen | Abdo RES | Abdo RES | - | 10 | High pass 0.05 | Respitrace Inducatnce Plethysmography |
| Position | Position | Position | - | 1 | High pass 0.05 | Internal mercury gauge |
| Light | Light | Light | - | 1 | - | External ambient light sensor |
| Airflow | New Air | New Air | - | 10 | High pass 0.05 | ProTech thermistor M325 (New Air channel 17) |
| Airflow (alternate) | Airflow | Airflow | - | 10 | High pass 0.05 | Compumedics thermistor (AUX channel 12) |
| Oximetry Status | OX STAT | OX STAT | - | 1 | - | Nonin XPOD 3011, 8000 sensor |
| REF | - | Fpz | - | - | - | - |
| Ground | - | PG1 | - | - | - | - |
